# Supplementary material
Source: publisher figshare collection journal article supplement (https://frontiersin.figshare.com/ndownloader/files/28270914)
Supplement: Supplementary file [file 28270914]

# **The frequency and effect of granulocytic myeloid-derived suppressor cells on mycobacterial survival in patients with tuberculosis: a preliminary report**

<sup>1</sup>Malika Davids, <sup>1</sup>Anil Pooran, <sup>1,2</sup>Liezel Smith\*, <sup>1</sup>Michele Tomasicchio, and <sup>1,3</sup>Keertan Dheda

1. Centre for Lung Infection and Immunity, Division of Pulmonology, Department of Medicine and UCT Lung Institute & South African MRC/UCT Centre for the Study of Antimicrobial Resistance, University of Cape Town, Cape Town, South Africa.
2. DSI-NRF Centre of Excellence for Biomedical Tuberculosis Research; South African Medical Research Council Centre for Tuberculosis Research; Division of Molecular Biology and Human Genetics, Faculty of Medicine and Health Sciences, Stellenbosch University, Cape Town.
3. Faculty of Infectious and Tropical Diseases, Department of Immunology and Infection, London School of Hygiene and Tropical Medicine, London, UK

**Table S1: Purity of Myeloid derived suppressor cells (MDSC) isolated from active TB patients**

| <b>Study participant ID</b> | <b>Total number of Myeloid derived suppressor cells (MDSC) isolated</b> | <b>Percentage MDSC purity</b> |
|-----------------------------|-------------------------------------------------------------------------|-------------------------------|
| TB012                       | 1.1X10 <sup>6</sup> cells                                               | 97 %                          |
| TB013                       | 0.9X10 <sup>6</sup> cells                                               | 98 %                          |
| TB014                       | 1.6X10 <sup>6</sup> cells                                               | 96 %                          |
| TB015                       | 2.0X10 <sup>6</sup> cells                                               | 95 %                          |
| TB016                       | 1.4X10 <sup>6</sup> cells                                               | 98 %                          |
| TB017                       | 1.1X10 <sup>6</sup> cells                                               | 97 %                          |
| TB018                       | 0.8X10 <sup>6</sup> cells                                               | 99 %                          |
| TB019                       | 1.6X10 <sup>6</sup> cells                                               | 96 %                          |
| TB020                       | 1.2X10 <sup>6</sup> cells                                               | 96 %                          |
| TB021                       | 1.1X10 <sup>6</sup> cells                                               | 98 %                          |
| TB022                       | 1.8X10 <sup>6</sup> cells                                               | 95 %                          |
| TB023                       | 1.0X10 <sup>6</sup> cells                                               | 98 %                          |
